# Supplementary material
Source: PubMed Central journal article supplement (PMC9847471)
Supplement: NIHMS1861911-supplement-SupplementalFigureS1andTableS1.pdf [file NIHMS1861911-supplement-SupplementalFigureS1andTableS1.pdf]

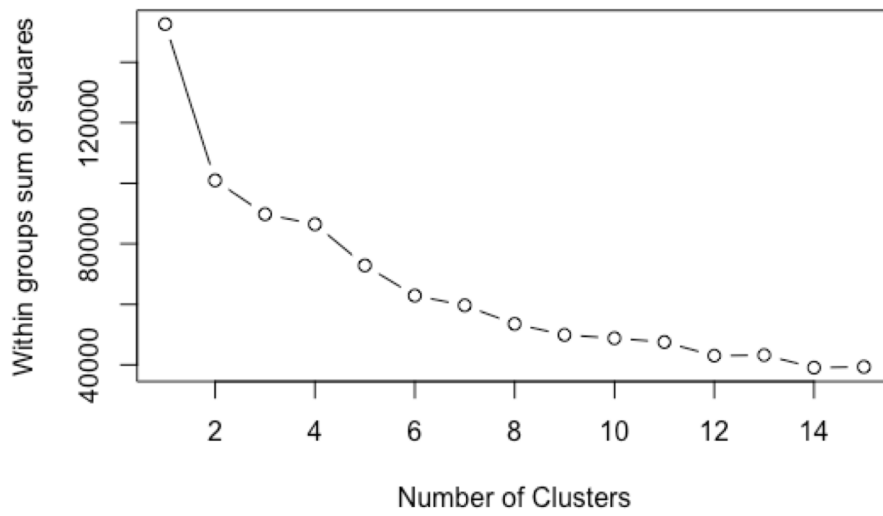

**Supplemental Figure 1.** Elbow plot displaying within-group sum of squares for cluster solutions  $k = 1:14$ .

**Table S1. Summary of initially specified regression models (for PSI Child and Parent Domains) including all explanatory variables tested simultaneously**

| Estimated Parameters                                              | PSI Child Domain<br>(child-related stress) | PSI Parent Domain<br>(non-child-related stress) |
|-------------------------------------------------------------------|--------------------------------------------|-------------------------------------------------|
|                                                                   | $\beta$ (Standard Error), $p$ value        | $\beta$ (Standard Error), $p$ value             |
| Intercept                                                         | 33.94 (12.85), $p = 0.01$                  | 75.96 (15.9), $p < 0.001$                       |
| Diagnosis                                                         | 1.54 (2.27), $p = 0.49$                    | -17.38 (5.3), $p = 0.002$                       |
| CBCL Externalizing Behavior                                       | 0.47 (0.13), $p = 0.0005$                  | 0.04 (0.2), $p = 0.82$                          |
| CBCL ASD T-score                                                  | 0.17 (0.1), $p = 0.07$                     | 0.09 (0.1), $p = 0.48$                          |
| CBCL ADHD T-score                                                 | -0.004 (0.2), $p = 0.97$                   | 0.05 (0.3), $p = 0.82$                          |
| CBCL Oppositional T-score                                         | -0.22 (0.1), $p = 0.14$                    | -----                                           |
| Vineland Communication                                            | -0.08 (0.06), $p = 0.18$                   | -0.11 (0.1), $p = 0.26$                         |
| Vineland Socialization                                            | -0.03 (0.1), $p = 0.71$                    | -0.05 (0.1), $p = 0.71$                         |
| SCQ Total score                                                   | 0.06 (0.1), $p = 0.67$                     | 0.35 (0.2), $p = 0.08$                          |
| PSI Parent Domain                                                 | 0.05 (0.1), $p = 0.57$                     | -----                                           |
| Child Age                                                         | -0.02 (0.1), $p = 0.63$                    | -0.15 (0.1), $p = 0.08$                         |
| Child Sex/Gender                                                  | 1.40 (1.5), $p = 0.36$                     | 0.71 (2.2), $p = 0.74$                          |
| Ethnicity                                                         | -3.12 (1.5), $p = 0.04$                    | 0.08 (2.4), $p = 0.97$                          |
| Parent Marital Status                                             | -----                                      | 5.42 (2.76), $p = 0.06$                         |
| INR (Income to Needs Ratio)                                       | -----                                      | -3.85 (1.4), $p = 0.007$                        |
| INR x Diagnosis interaction                                       | -----                                      | 2.70 (0.8), $p = 0.003$                         |
| Number of Children at Home                                        | 0.86 (0.8), $p = 0.27$                     | -----                                           |
| <b>Overall Model Fit (F, R<sup>2</sup>, <math>p</math>-value)</b> | 23.83, 0.80, $p < 0.0001$                  | 3.44, 0.51, $p = 0.0008$                        |

*Note.* Initial regression models, implemented for model specification, with all variables showing significant bivariate associations with parental stress (for child- and parent-related parental stress, separately) included as explanatory variables. Final regression models are summarized in Table 2.
